# Supplementary material for: Photoinduced electron-transfer within osmium(II) and ruthenium(II) bis-terpyridine donor acceptor dyads
Source: Royal Society of Chemistry journal article supplement (doi:10.1039/b903130h), 2009-01-01
Supplement: b903130h.pdf [file b903130h.pdf]

# Supporting Information for: Photoinduced Electron-Transfer within Osmium(II) and Ruthenium(II) *bis*-Terpyridine Donor Acceptor Dyads

Elvin A. Alemán, Carol D. Shreiner, Cheruvallil S. Rajesh, Timothy Smith, Shana A. Garrison,  
David A. Modarelli\*

Department of Chemistry and The Center for Laser and Optical Spectroscopy, Knight Chemical  
Laboratory, The University of Akron, Akron, Ohio 44325-3601

**9 PAGES**

## TABLE OF CONTENTS

- 1) Transient absorption spectra of Ru(tpy)<sub>2</sub><sup>2+</sup>-benzoquinone dyad **5** and Os(tpy)<sub>2</sub><sup>2+</sup>-benzoquinone dyad **8** (Figures S1 – S2).
- 2) Time-resolved spectra of Ru(tpy)<sub>2</sub><sup>2+</sup>-benzoquinone dyad **5** at 515 nm (growth) and 600 nm (decay) (Figures S3 – S4).
- 3) Time-resolved spectra of Ru(tpy)<sub>2</sub><sup>2+</sup>-benzoquinone dyad **6** at 515 nm (growth) and 600 nm (decay) (Figures S4 – S6).
- 4) Time-resolved spectra of Os(tpy)<sub>2</sub><sup>2+</sup>-benzoquinone dyad **7** at 430 nm (decay), 520 nm (growth) and 600 nm (decay) (Figures S7 – S9).
- 5) Time-resolved spectra of Os(tpy)<sub>2</sub><sup>2+</sup>-benzoquinone dyad **8** at 430 nm (decay), 520 nm (growth) and 600 nm (decay) (Figures S10 – S12).

1). Transient absorption spectra of  $Ru(tpy)_2^{2+}$ -benzoquinone dyad **5** and  $Os(tpy)_2^{2+}$ -benzoquinone dyad **8**.

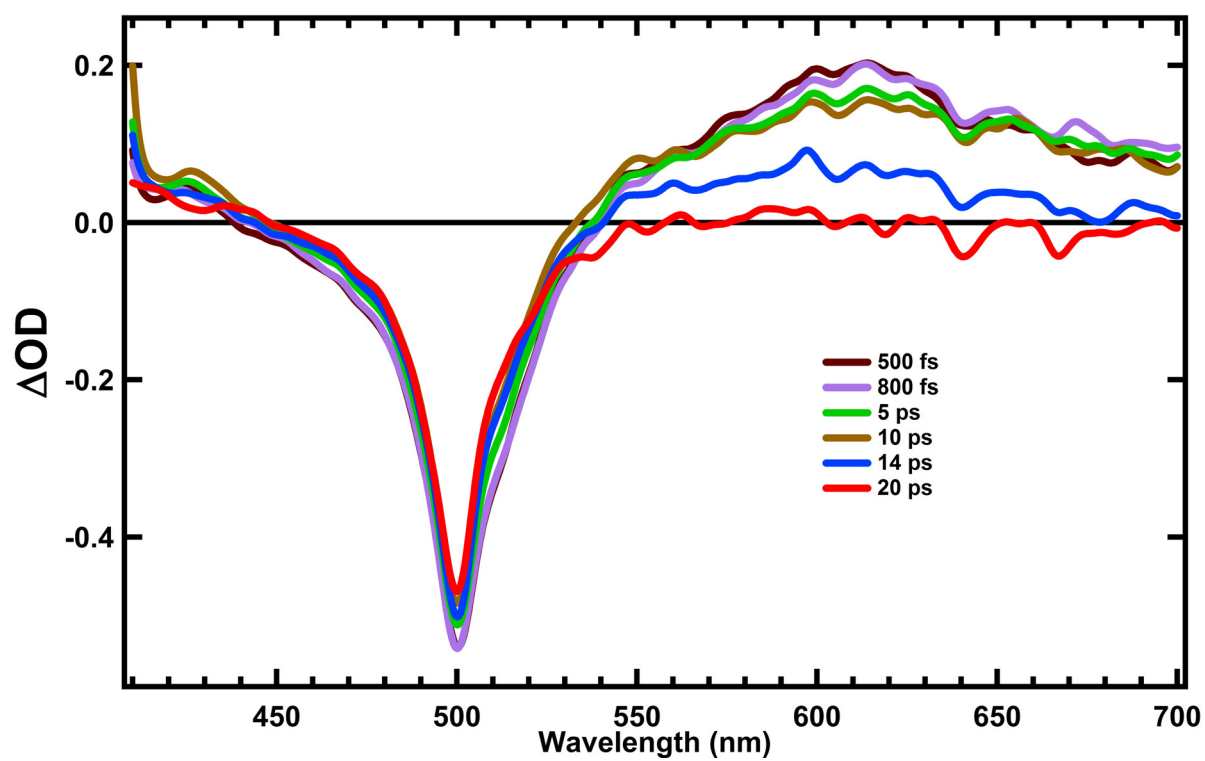

**Figure S1.** A series of representative transient absorption spectra are shown for **5** in acetonitrile as a function of time.

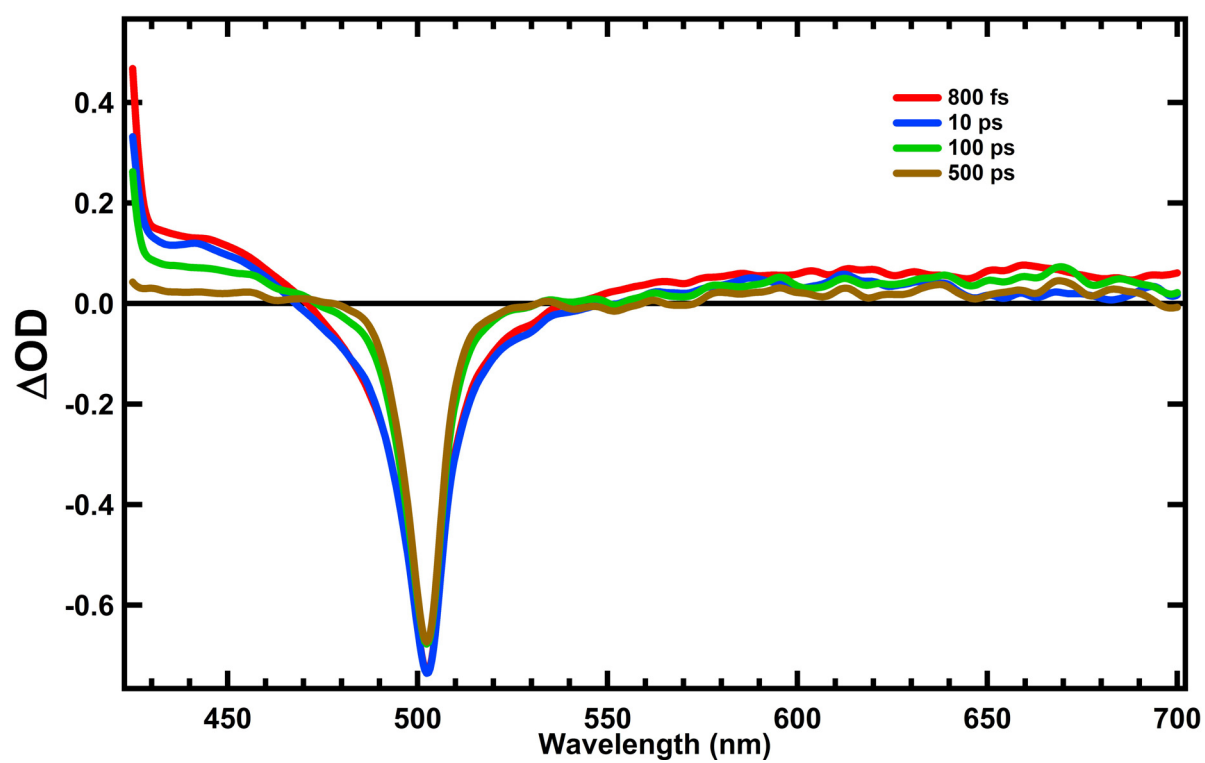

**Figure S2.** A series of representative transient absorption spectra are shown for **8** in acetonitrile as a function of time.

2) Time-resolved spectra of  $Ru(tpy)_2^{2+}$ -benzoquinone dyad **5** at 515 nm (growth) and 600 nm (decay).

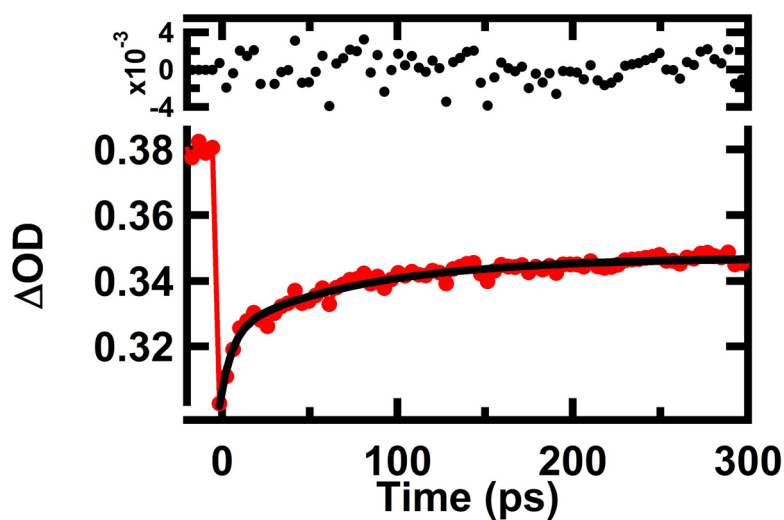

**Figure S3.** Time-resolved spectra taken at 515 nm ( $\lambda_{ex}$  500 nm) for **5** in acetonitrile as a function of time.

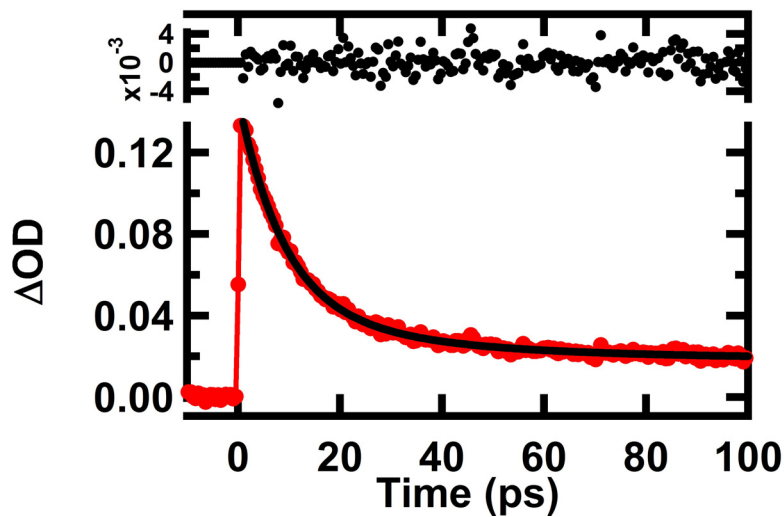

**Figure S4.** Time-resolved spectra taken at 600 nm ( $\lambda_{ex}$  500 nm) for **5** in acetonitrile as a function of time.

3) Time-resolved spectra of  $Ru(tpy)_2^{2+}$ -benzoquinone dyad **6** at 515 nm (growth) and 600 nm (decay).

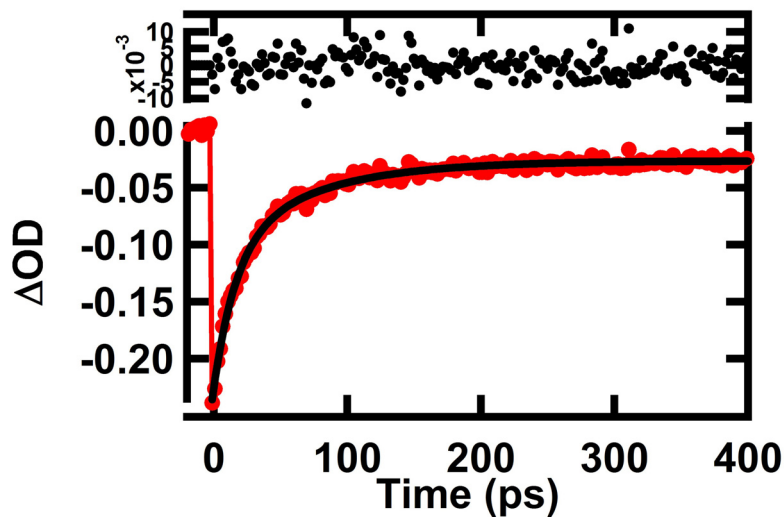

**Figure S5.** Time-resolved spectra taken at 515 nm ( $\lambda_{ex}$  500 nm) for **6** in acetonitrile as a function of time.

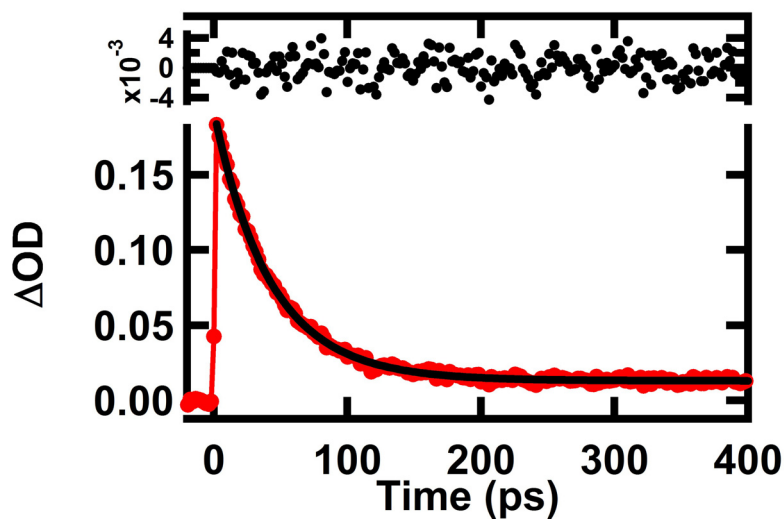

**Figure S6.** Time-resolved spectra taken at 600 nm ( $\lambda_{ex}$  500 nm) for **6** in acetonitrile as a function of time.

4) Time-resolved spectra of  $Os(tpy)_2^{2+}$ -benzoquinone dyad **7** at 430 nm (decay), 520 nm (growth) and 600 nm (decay).

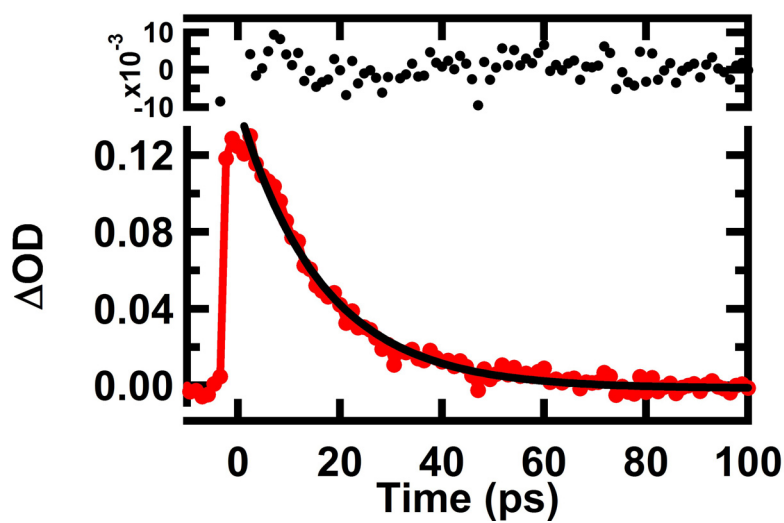

**Figure S8.** Time-resolved spectra taken at 430 nm ( $\lambda_{ex}$  480 nm) for **7** in acetonitrile as a function of time.

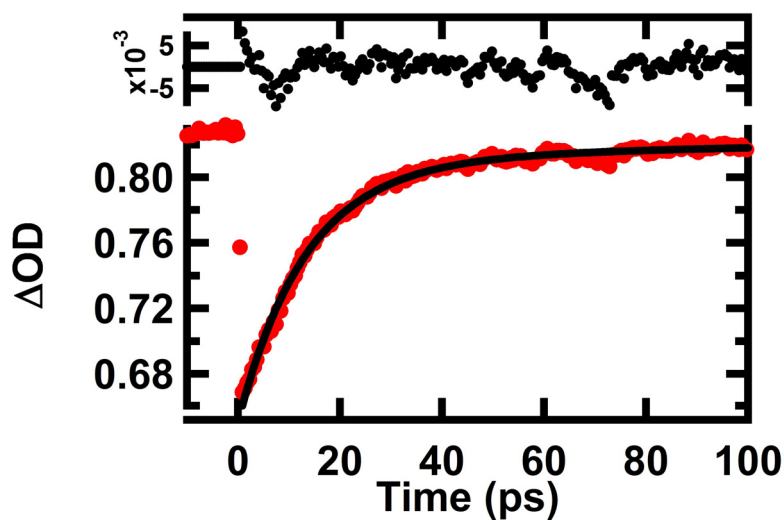

**Figure S9.** Time-resolved spectra taken at 520 nm ( $\lambda_{ex}$  480 nm) for **7** in acetonitrile as a function of time.

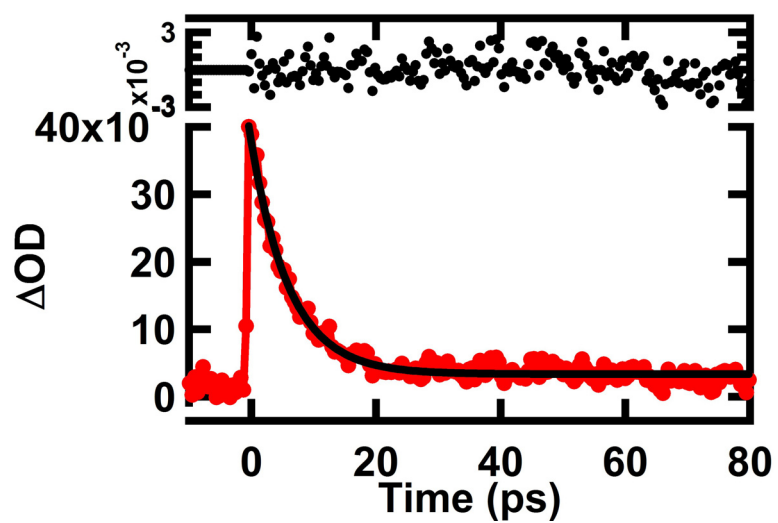

a **Figure S10.** Time-resolved spectra taken at 600 nm ( $\lambda_{\text{ex}}$  480 nm) for 7 in acetonitrile as function of time.

5) Time-resolved spectra of  $\text{Os}(\text{tpy})_2^{2+}$ -benzoquinone dyad **8** at 430 nm (decay), 520 nm (growth) and 600 nm (decay).

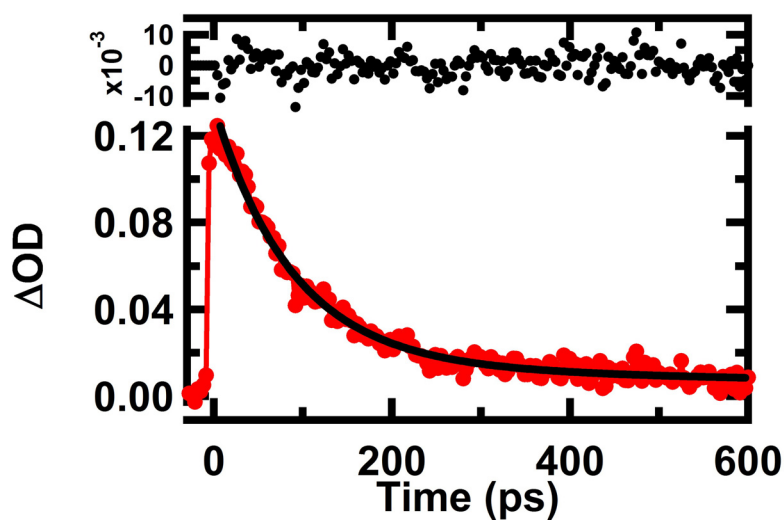

a **Figure S11.** Time-resolved spectra taken at 430 nm ( $\lambda_{\text{ex}}$  480 nm) for **8** in acetonitrile as function of time.

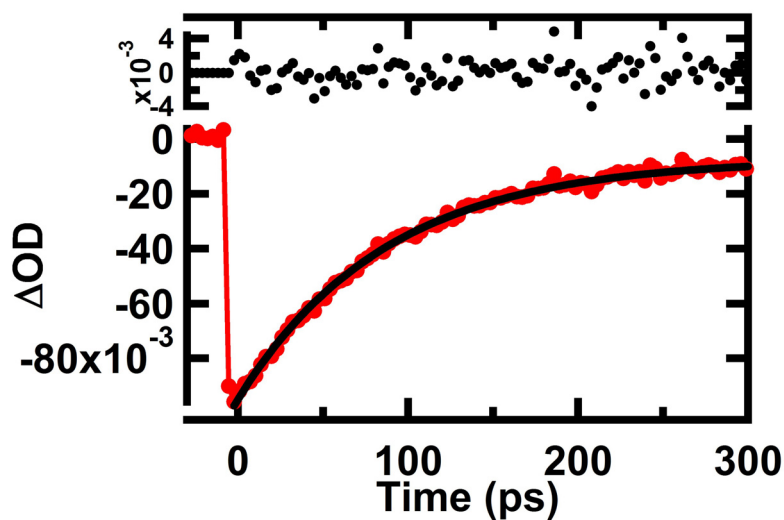

a **Figure S12.** Time-resolved spectra taken at 520 nm ( $\lambda_{\text{ex}}$  480 nm) for **8** in acetonitrile as function of time.



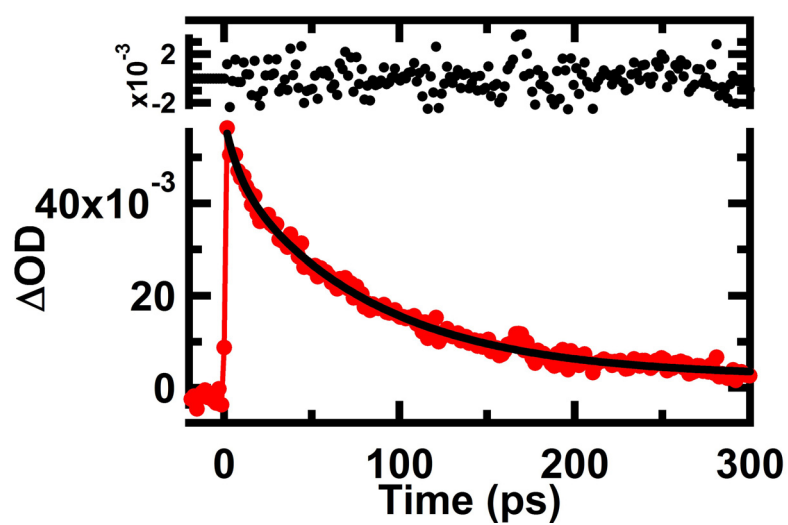

a **Figure S13.** Time-resolved spectra taken at 600 nm ( $\lambda_{\text{ex}}$  480 nm) for **8** in acetonitrile as function of time.
